# Supplementary material for: Decreased H19, GAS5, and linc0597 Expression and Association Analysis of Related Gene Polymorphisms in Rheumatoid Arthritis
Source: PubMed Central journal article supplement (PMC7022387; doi:10.3390/biom10010055), 2019-12-29
Supplement: biomolecules-10-00055-s001.pdf [file biomolecules-10-00055-s001.pdf]

Table S1. Characteristics of RA patients and controls in the stage of lncRNAs  
expression detection

| Characteristics         | RA(n=77)        | HC(n=78)        | $\chi^2 / t$ | <i>P</i> |
|-------------------------|-----------------|-----------------|--------------|----------|
| Sex n(%)                |                 |                 | 0.002        | 0.965    |
| Male                    | 18 (23.4)       | 18 (23.1)       |              |          |
| Female                  | 59 (76.6)       | 60 (76.9)       |              |          |
| Age (y) (mean $\pm$ SD) | 58.0 $\pm$ 13.2 | 56.0 $\pm$ 10.6 | 1.047        | 0.297    |

y, years; RA, rheumatoid arthritis; HC, control, SD, standard deviation.

Table S2. Characteristics of RA patients and controls in the stage of genotyping

| Characteristics  | SNPs       | Number |     | RA        | HC        | $t/\chi^2$ | P value | $P_{HWE}(HC)$<br>value |
|------------------|------------|--------|-----|-----------|-----------|------------|---------|------------------------|
|                  |            | RA     | HC  |           |           |            |         |                        |
| Sex(male/female) | rs2067051  | 816    | 746 | 125/691   | 141/605   | 3.539      | >0.05   | >0.05                  |
| Age (y)          |            |        |     | 53.2±13.1 | 52.5±13.9 | -0.890     | >0.05   |                        |
| Sex(male/female) | rs2075745  | 803    | 747 | 122/681   | 133/614   | 1.920      | >0.05   | >0.05                  |
| Age (y)          |            |        |     | 53.1±13.1 | 52.5±14.1 | -0.780     | >0.05   |                        |
| Sex(male/female) | rs2877877  | 822    | 723 | 128/694   | 130/593   | 1.605      | >0.05   | >0.05                  |
| Age (y)          |            |        |     | 53.2±13.0 | 52.3±14.0 | -1.281     | >0.05   |                        |
| Sex(male/female) | rs2070107  | 832    | 763 | 126/706   | 143/620   | 3.674      | >0.05   | >0.05                  |
| Age (y)          |            |        |     | 53.0±13.0 | 52.6±14.0 | -0.485     | >0.05   |                        |
| Sex(male/female) | rs2632516  | 828    | 780 | 128/700   | 149/631   | 3.740      | >0.05   | >0.05                  |
| Age (y)          |            |        |     | 53.0±13.0 | 52.7±14.0 | -0.434     | >0.05   |                        |
| Sex(male/female) | rs6790     | 825    | 775 | 127/698   | 146/629   | 3.351      | >0.05   | >0.05                  |
| Age (y)          |            |        |     | 53.2±13.1 | 52.9±13.9 | -0.370     | >0.05   |                        |
| Sex(male/female) | rs2285991  | 787    | 707 | 118/669   | 132/575   | 3.613      | >0.05   | >0.05                  |
| Age (y)          |            |        |     | 52.9±13.0 | 52.8±13.9 | -0.088     | >0.05   |                        |
| Sex(male/female) | rs13414    | 720    | 676 | 110/610   | 129/547   | 3.558      | >0.05   | >0.05                  |
| Age (y)          |            |        |     | 53.4±12.9 | 52.5±14.1 | -1.178     | >0.05   |                        |
| Sex(male/female) | rs4372750  | 715    | 678 | 109/606   | 129/549   | 3.513      | >0.05   | >0.05                  |
| Age (y)          |            |        |     | 53.3±12.9 | 52.4±14.2 | -1.226     | >0.05   |                        |
| Sex(male/female) | rs12601867 | 731    | 692 | 112/619   | 132/560   | 3.526      | >0.05   | >0.05                  |
| Age (y)          |            |        |     | 53.4±12.9 | 52.4±14.3 | -1.329     | >0.05   |                        |
| Sex(male/female) | rs16847206 | 727    | 677 | 110/617   | 129/548   | 3.776      | >0.05   | >0.05                  |
| Age (y)          |            |        |     | 53.3±12.9 | 52.5±14.1 | -1.033     | >0.05   |                        |
| Sex(male/female) | rs6692753  | 726    | 683 | 110/616   | 129/554   | 3.487      | >0.05   | >0.05                  |
| Age (y)          |            |        |     | 53.2±12.9 | 52.4±14.3 | -1.120     | >0.05   |                        |
| Sex(male/female) | rs2680700  | 720    | 683 | 111/609   | 132/551   | 3.755      | >0.05   | >0.05                  |
| Age (y)          |            |        |     | 53.2±12.9 | 52.4±14.2 | -1.078     | >0.05   |                        |
| Sex(male/female) | rs8071916  | 726    | 692 | 109/617   | 131/561   | 3.645      | >0.05   | >0.05                  |
| Age (y)          |            |        |     | 53.3±12.9 | 51.4±14.2 | -1.210     | >0.05   |                        |

Abbreviation: y, years; RA, rheumatoid arthritis; HC, control;  $P_{HWE}$ , P-value for Hardy-Weinberg equilibrium.

Table S3. Associations of fourteen SNPs with risk of different serotypes in RA patients

| SNPs      | Allele (M/m) | Clinical features | Group    | Genotype n (%) |           |           | $P_{\text{adjust}}$ value | Allele n (%) |           | $P$ value |
|-----------|--------------|-------------------|----------|----------------|-----------|-----------|---------------------------|--------------|-----------|-----------|
|           |              |                   |          | MM             | Mm        | mm        |                           | M            | m         |           |
| rs6790    | G/A          | Anti-CCP          | Positive | 298(43.4)      | 280(40.8) | 109(15.9) | 0.701                     | 876(63.8)    | 498(36.2) | 0.419     |
|           |              |                   | Negative | 47(46.1)       | 42(41.2)  | 13(12.7)  |                           | 136(66.7)    | 68(33.3)  |           |
|           |              | RF                | Positive | 298(43.8)      | 275(40.4) | 107(15.7) | 0.963                     | 871(64.0)    | 489(36.0) |           |
|           |              |                   | Negative | 54(44.3)       | 50(41.0)  | 18(14.8)  |                           | 158(64.8)    | 86(35.2)  |           |
| rs2067051 | C/T          | Anti-CCP          | Positive | 322(47.4)      | 276(40.6) | 82(12.1)  | 0.279                     | 920(67.6)    | 440(32.4) | 0.545     |
|           |              |                   | Negative | 41(41.0)       | 49(49.0)  | 10(10.0)  |                           | 131(65.5)    | 69(34.5)  |           |
|           |              | RF                | Positive | 309(46.0)      | 275(40.9) | 88(13.1)  | 0.471                     | 893(66.4)    | 451(33.6) |           |
|           |              |                   | Negative | 58(47.9)       | 52(43.0)  | 11(9.1)   |                           | 168(69.4)    | 74(30.6)  |           |
| rs2075745 | A/T          | Anti-CCP          | Positive | 299(44.8)      | 274(41.1) | 94(14.1)  | 0.118                     | 872(65.4)    | 462(34.6) | 0.352     |
|           |              |                   | Negative | 36(36.0)       | 52(52.0)  | 12(12.0)  |                           | 124(62.0)    | 76(38.0)  |           |
|           |              | RF                | Positive | 286(43.3)      | 277(41.9) | 98(14.8)  | 0.527                     | 849(64.2)    | 473(35.8) |           |
|           |              |                   | Negative | 53(44.5)       | 53(44.5)  | 13(10.9)  |                           | 159(66.8)    | 79(33.2)  |           |
| rs2877877 | A/G          | Anti-CCP          | Positive | 411(60.1)      | 230(33.6) | 43(6.3)   | 0.851                     | 1052(76.9)   | 316(23.1) | 0.627     |
|           |              |                   | Negative | 63(61.8)       | 34(33.3)  | 5(4.9)    |                           | 160(78.4)    | 44(21.6)  |           |
|           |              | RF                | Positive | 414(60.9)      | 224(32.9) | 42(6.2)   | 0.744                     | 1052(77.4)   | 308(22.6) |           |
|           |              |                   | Negative | 68(57.1)       | 43(36.1)  | 8(6.7)    |                           | 179(75.2)    | 59(24.8)  |           |
| rs2070107 | G/C          | Anti-CCP          | Positive | 483(69.7)      | 190(27.4) | 20(2.9)   | 0.739                     | 1156(83.4)   | 230(16.6) | 0.507     |
|           |              |                   | Negative | 68(66.0)       | 32(31.1)  | 3(2.9)    |                           | 168(81.6)    | 38(18.4)  |           |
|           |              | RF                | Positive | 482(70.3)      | 184(26.8) | 20(2.9)   | 0.180                     | 1148(83.7)   | 224(16.3) |           |
|           |              |                   | Negative | 77(62.6)       | 43(35.0)  | 3(2.4)    |                           | 197(80.1)    | 49(19.9)  |           |
| rs2632516 | C/G          | Anti-CCP          | Positive | 154(22.4)      | 307(44.6) | 228(33.1) | 0.423                     | 615(44.6)    | 763(55.4) | 0.890     |
|           |              |                   | Negative | 20(19.4)       | 53(51.5)  | 30(29.1)  |                           | 93(45.1)     | 113(54.9) |           |
|           |              | RF                | Positive | 149(21.8)      | 303(44.4) | 231(33.8) | 0.118                     | 601(44.0)    | 765(56.0) |           |
|           |              |                   | Negative | 28(23.0)       | 64(52.5)  | 30(24.6)  |                           | 120(49.2)    | 124(50.8) |           |

|            |     |           |          |           |           |           |       |            |           |        |
|------------|-----|-----------|----------|-----------|-----------|-----------|-------|------------|-----------|--------|
| rs2285991  | G/A | Anti -CCP | Positive | 577(87.4) | 75(11.4)  | 8(1.2)    | 0.107 | 1299(93.1) | 91(6.9)   | <0.001 |
|            |     |           | Negative | 77(81.9)  | 17(18.1)  | 0(0.0)    |       | 171(91.0)  | 31(9.0)   |        |
|            |     | RF        | Positive | 560(86.3) | 80(12.3)  | 9(1.4)    | 0.411 | 1200(92.4) | 98(7.6)   | 0.002  |
|            |     |           | Negative | 100(86.2) | 16(13.8)  | 0(0.0)    |       | 216(86.4)  | 34(13.6)  |        |
| rs13414    | A/G | Anti-CCP  | Positive | 296(50.5) | 235(40.1) | 55(9.4)   | 0.777 | 827(70.6)  | 345(29.4) | 0.760  |
|            |     |           | Negative | 48(50.5)  | 36(37.9)  | 11(11.6)  |       | 132(69.5)  | 58(30.5)  |        |
|            |     | RF        | Positive | 305(50.7) | 239(39.7) | 58(9.6)   | 0.912 | 849(70.5)  | 355(29.5) | 0.971  |
|            |     |           | Negative | 53(51.5)  | 39(37.9)  | 11(10.7)  |       | 145(70.4)  | 61(29.6)  |        |
| rs4372750  | C/A | Anti-CCP  | Positive | 138(23.8) | 304(52.4) | 138(23.8) | 0.839 | 580(50.0)  | 580(50.0) | 0.687  |
|            |     |           | Negative | 20(21.1)  | 52(54.7)  | 23(24.2)  |       | 92(48.4)   | 98(51.6)  |        |
|            |     | RF        | Positive | 146(24.5) | 310(52.1) | 139(23.4) | 0.470 | 602(50.6)  | 588(49.4) | 0.295  |
|            |     |           | Negative | 20(19.0)  | 58(55.2)  | 27(25.7)  |       | 98(46.7)   | 112(53.3) |        |
| rs12601867 | C/G | Anti-CCP  | Positive | 135(22.7) | 311(52.4) | 148(24.9) | 0.872 | 581(48.9)  | 607(51.1) | 0.991  |
|            |     |           | Negative | 23(24.2)  | 47(49.5)  | 25(26.3)  |       | 93(48.9)   | 97(51.1)  |        |
|            |     | RF        | Positive | 136(22.4) | 315(51.8) | 157(25.8) | 0.752 | 587(48.3)  | 629(51.7) | 0.473  |
|            |     |           | Negative | 27(25.5)  | 54(50.9)  | 25(23.6)  |       | 108(50.9)  | 104(49.1) |        |
| rs16847206 | A/T | Anti-CCP  | Positive | 268(45.4) | 269(45.6) | 53(9.0)   | 0.629 | 805(68.2)  | 375(31.8) | 0.354  |
|            |     |           | Negative | 48(50.5)  | 40(42.1)  | 7(7.4)    |       | 136(71.6)  | 54(28.4)  |        |
|            |     | RF        | Positive | 280(46.2) | 273(45.0) | 53(8.7)   | 0.864 | 833(68.7)  | 379(31.3) | 0.885  |
|            |     |           | Negative | 50(48.1)  | 44(42.3)  | 10(9.6)   |       | 144(69.2)  | 64(30.8)  |        |
| rs6692753  | G/T | Anti-CCP  | Positive | 269(45.5) | 267(45.2) | 55(9.3)   | 0.439 | 805(68.1)  | 377(31.9) | 0.212  |
|            |     |           | Negative | 49(51.6)  | 40(42.1)  | 6(6.3)    |       | 138(72.6)  | 52(27.4)  |        |
|            |     | RF        | Positive | 278(46.0) | 273(45.2) | 53(8.8)   | 0.512 | 829(68.6)  | 379(31.4) | 0.669  |
|            |     |           | Negative | 54(50.5)  | 42(39.3)  | 11(10.3)  |       | 150(70.1)  | 64(29.9)  |        |
| rs2680700  | G/T | Anti-CCP  | Positive | 328(56.0) | 206(35.2) | 52(8.9)   | 0.401 | 862(73.5)  | 310(26.5) | 0.202  |
|            |     |           | Negative | 59(63.4)  | 27(29.0)  | 7(7.5)    |       | 145(80.0)  | 41(22.0)  |        |
|            |     | RF        | Positive | 346(57.8) | 198(33.1) | 55(9.2)   | 0.439 | 890(74.3)  | 308(25.7) | 0.607  |
|            |     |           | Negative | 55(52.9)  | 41(39.4)  | 8(7.7)    |       | 151(72.6)  | 57(27.4)  |        |
| rs8071916  | A/G | Anti-CCP  | Positive | 140(23.7) | 305(51.7) | 145(24.6) | 0.991 | 585(49.6)  | 595(50.4) | 0.913  |
|            |     |           | Negative | 23(24.0)  | 50(52.1)  | 23(24.0)  |       | 96(50.0)   | 96(50.0)  |        |
|            |     | RF        | Positive | 147(24.3) | 312(51.7) | 145(24.0) | 0.904 | 606(50.2)  | 602(49.8) | 0.673  |
|            |     |           | Negative | 24(22.4)  | 56(52.3)  | 27(25.2)  |       | 104(48.6)  | 110(51.4) |        |

Anti-CCP, anti-cyclic citrullinated peptide; RF, rheumatoid factor; M, major alleles; m, minor alleles; a, Fisher's exact test; SNP, single nucleotide polymorphism;  $P_{\text{adjust}}$ ,  $P$ -value adjusted for gender and age.

**Table S4.** e-QTLs effects of rs2680700 and rs6790 in multi-tissues.

| Gencode Id                         | Gene        | <i>P</i> value | Effect size | Tissue                         |
|------------------------------------|-------------|----------------|-------------|--------------------------------|
| eQTLs of rs2680700 in multi-tissue |             |                |             |                                |
| ENSG00000108395.13                 | TRIM37      | 3.30E-15       | 0.29        | Whole Blood                    |
| ENSG00000108384.14                 | RAD51C      | 4.80E-09       | 0.22        | Whole Blood                    |
| ENSG00000213246.6                  | SUPT4H1     | 1.00E-08       | -0.12       | Skin-Sun Exposed (Lower leg)   |
| ENSG00000121101.15                 | TEX14       | 3.90E-07       | 0.28        | Thyroid                        |
| ENSG00000005379.15                 | TSPOAP1     | 0.0000062      | 0.13        | Cells - Cultured fibroblasts   |
| ENSG00000265148.5                  | TSPOAP1-AS1 | 0.000091       | -0.11       | Whole Blood                    |
| eQTLs of rs6790 in multi-tissue    |             |                |             |                                |
| ENSG00000270084.1                  | GAS5-AS1    | 2.6e-8         | -1.00       | Colon - Transverse             |
| ENSG00000152061.17                 | RABGAP1L    | 7.2e-7         | 0.43        | Adipose - Subcutaneous         |
| ENSG00000183831.6                  | ANKRD45     | 0.0000042      | 0.56        | Cells- Transformed fibroblasts |
| ENSG00000152061.17                 | RABGAP1L    | 0.0000095      | 0.32        | Skin-Sun Exposed (Lower leg)   |
| ENSG00000270084.1                  | GAS5-AS1    | 0.000014       | -0.38       | Cells- Transformed fibroblasts |
| ENSG00000270084.1                  | GAS5-AS1    | 0.000055       | -0.84       | Adrenal Gland                  |
| ENSG00000152061.17                 | RABGAP1L    | 0.000065       | 0.37        | Cells- Transformed fibroblasts |
